# Supplementary material
Source: Research Square preprint supplement (doi:10.21203/rs.3.rs-9721650/v1)
Supplement: Supplementary file 2 [file 2e3306dbe8fc2f6cc9509379.docx]

**Scheme 1.** The synthesis and sensing strategies of probe Rh-Ph-Rh
