# Supplementary material
Source: Research Square preprint supplement (doi:10.21203/rs.3.rs-9721650/v1)
Supplement: Supplementary file 3 [file 6b2367aaf1667e14725bd45d.docx]

**Graphical Abstract**
